# Supplementary material for: Efficient hydrolysis of cellulose into glucose over sulfonated polynaphthalene (SPN) and rapid determination of glucose using positive corona discharge ion mobility spectrometry
Source: Royal Society of Chemistry journal article supplement (doi:10.1039/c5ra27325k), 2016-01-01
Supplement: c5ra27325k1.pdf [file c5ra27325k1.pdf]

## Supplementary information

### Characterization of Catalysts

The X-ray diffraction (XRD) patterns of SPN is shown in Fig. S1. The XRD spectrum exhibits two broad and weak peaks ( $2\theta = 5-30^\circ$ ,  $35-45^\circ$ ) that can be attributed to amorphous carbon composed of aromatic carbon sheets oriented in a considerably random fashion

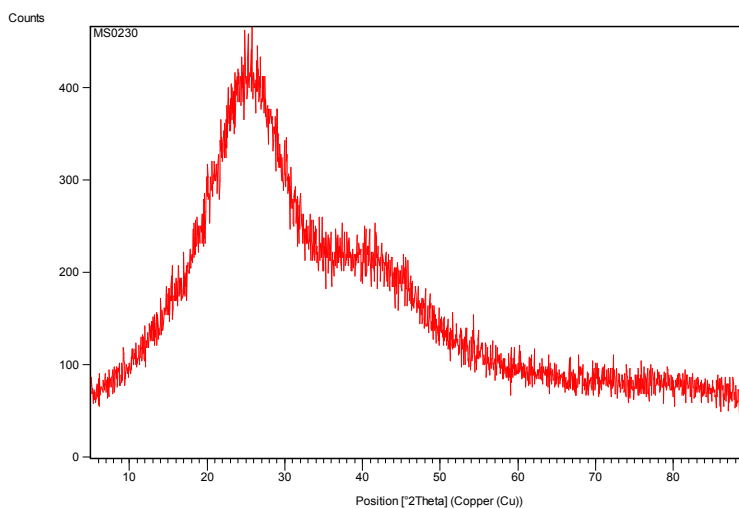

Fig. S1 X-ray diffraction patterns of SPN

The FT-IR spectra of the SPN catalysts is given in Fig. S2. The peaks at around  $3403\text{ cm}^{-1}$ ,  $1700\text{ cm}^{-1}$  and are ascribed to stretching vibrations of O–H from phenols and C=O. The absorption bands at around  $1160\text{ cm}^{-1}$  (O=S=O symmetric stretching) and  $1030\text{ cm}^{-1}$  ( $\text{SO}_3$  stretching modes in  $\text{SO}_3\text{H}$ ) are evidence that the as-prepared carbon materials were functionalized with ( $-\text{SO}_3\text{H}$ ) on the surface. The peak appeared at  $673\text{ cm}^{-1}$  can be assigned to stretching vibrations of C–Cl groups and implying that Cl atoms still remain after sulfonation.

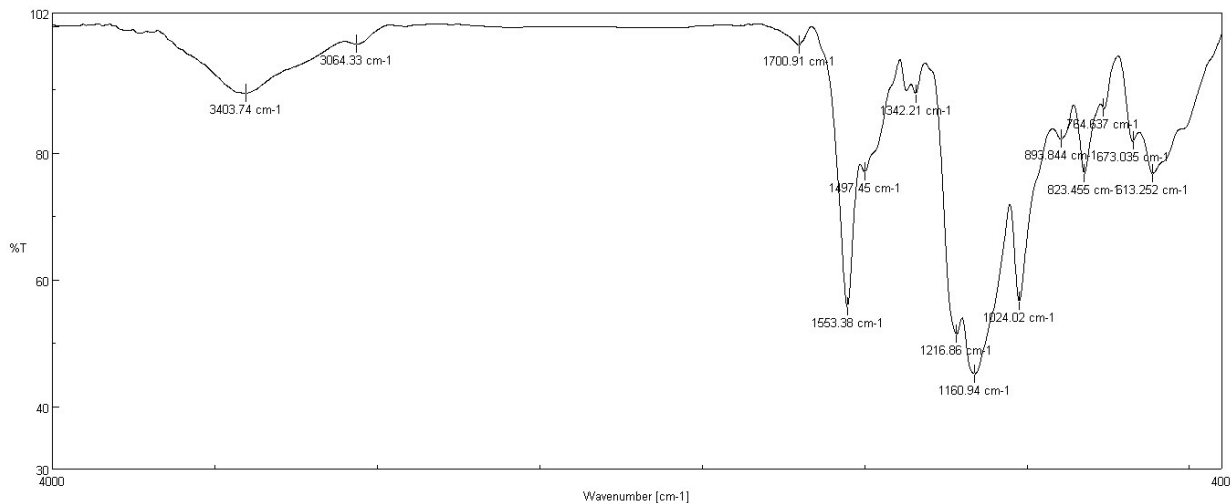

Fig. S2 FT-IR spectra of SPN

Table S1 The optimized experimental conditions for glucose

| Parameter                                  | Setting      |
|--------------------------------------------|--------------|
| Length of drift tube                       | 11 (cm)      |
| Drift field                                | 7600 (V)     |
| Corona voltage                             | 1200 (V)     |
| Flow rate of drift gas (N <sub>2</sub> )   | 800 (mL/min) |
| Flow rate of carrier gas (N <sub>2</sub> ) | 400 (mL/min) |
| Injection port temperature                 | 170 (°C)     |
| IMS cell temperature                       | 170 (°C)     |

Table S2 Catalytic activity of reused SPN for hydrolysis of pretreated cellulose <sup>a</sup>.

| Run                      | 1    | 2    | 3    | 4    |
|--------------------------|------|------|------|------|
| Cellulose conversion (%) | 67.6 | 66.5 | 65.7 | 67.5 |
| Glucose yield (%)        | 61.4 | 60.1 | 60.2 | 59.2 |
| Glucose selectivity (%)  | 90.8 | 90.4 | 91.6 | 87.7 |

<sup>a</sup> Pretreated cellulose, 0.05 g; catalyst, 0.1 g; water, 4 mL; reaction temperature, 120°C; reaction time, 18h.

Table S3 Recovery percentages of glucose for real sample samples

| Entry | Concentration (ng) |         | Recovery% |
|-------|--------------------|---------|-----------|
|       | Added              | Found   |           |
| 1     | 0                  | 90 ± 7  | 96        |
|       | 50                 | 144 ± 8 | -         |
| 2     | 0                  | 90 ± 7  | 102       |
|       | 100                | 188 ± 9 | -         |

Table S4 Recovery percentages of cellulose for real sample samples

| Entry | Concentration (g L <sup>-1</sup> ) |                | Recovery% |
|-------|------------------------------------|----------------|-----------|
|       | Added                              | Found          |           |
| 1     | 0                                  | 0.056 ± 0.0035 | 95        |
|       | 0.05                               | 0.109 ± 0.0062 | -         |
| 2     | 0                                  | 0.056 ± 0.0035 | 97        |
|       | 0.1                                | 0.158 ± 0.0053 | -         |
| 3     | 0                                  | 0.056 ± 0.0035 | 102       |
|       | 0.15                               | 0.205 ± 0.006  | -         |
